# Supplementary material for: Subtype-specific gout susceptibility loci and enrichment of selection pressure on ABCG2 and ALDH2 identified by subtype genome-wide meta-analyses of clinically defined gout patients
Source: PubMed Central journal article supplement (PMC7213308; doi:10.1136/annrheumdis-2019-216644), 2020-04-01
Supplement: annrheumdis-2019-216644supp001.pdf [file annrheumdis-2019-216644supp001.pdf]

## Supplementary materials

### Subtype-specific gout susceptibility loci and enrichment of selection pressure on *ABCG2* and *ALDH2* identified by subtype genome-wide meta-analyses of clinically-defined gout patients

A. Nakayama, M. Nakatochi, Y. Kawamura, K. Yamamoto, H. Nakaoka, *et al.*  
Correspondence to H. Matsuo. (email: hmatsuo@ndmc.ac.jp).

- Supplementary Figure S1** Gout classification and its pathophysiology
- Supplementary Figure S2** Regional plots around *CDC42BPG* on chromosome 11q13.1 locus
- Supplementary Figure S3** Genetic correlations between gout subtypes and between each subtype and serum uric acid levels
- Supplementary Table S1** Clinical characteristics of participants
- Supplementary Table S2** Clinical parameters of gout cases
- Supplementary Table S3** Frequency of concomitant diseases in gout cases
- Supplementary Table S4** Suggestive gout loci identified in the present genome-wide meta-analyses
- Supplementary Table S5** Overlap between natural selection signatures and genetic risk of gout and its subtypes in the Japanese population
- Supplementary Table S6** The effect of each gout locus from another trans-ancestry gout GWAS meta-analysis
- Supplementary Method**
- References for Supplementary Method**

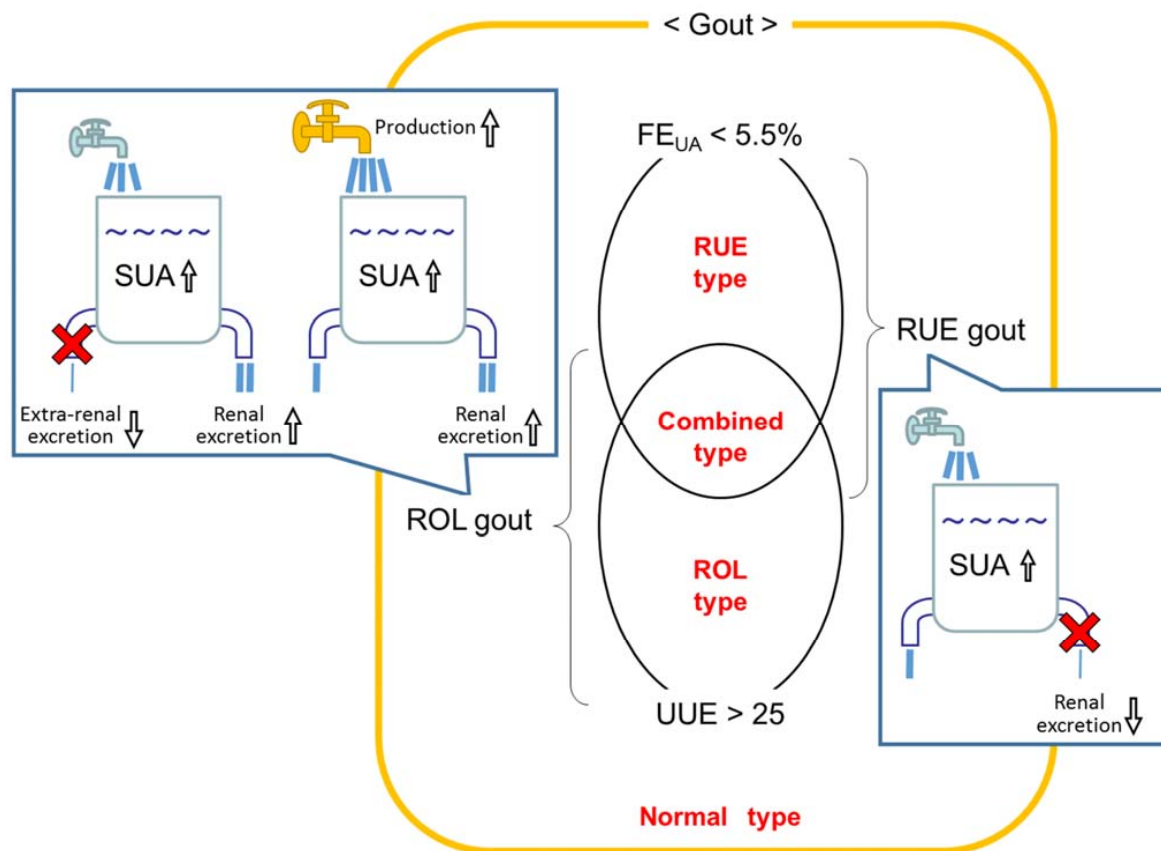

### Supplementary Figure S1 Gout classification and its pathophysiology

Gout results from hyperuricemia, which is characterized by an elevated serum uric acid (SUA) level. In humans, urate is produced in organs such as the liver, and is mostly excreted from the kidney and intestine. The causes of gout can be classified into renal overload (ROL) and renal underexcretion (RUE). ROL gout (previously, “urate overproduction gout”) is caused by genuine urate overproduction and/or by extra-renal underexcretion, both of which are characterized by increased urinary urate excretion [UUE; over 25.0 mg/hr/1.73 m<sup>2</sup> (600 mg/day/1.73 m<sup>2</sup>)]. On the other hand, RUE gout is caused by renal urate underexcretion, which features decreased urate clearance [urate clearance/creatinine clearance ratio, FE<sub>UA</sub>; under 5.5%]. In addition to these broad subtypes (RUE gout and ROL gout), there are four distinct subtypes of gout: these consist of RUE type, ROL type, combined type and normal type gout, as shown in this Figure. These differentiated subtypes are commonly used in clinical scenarios. See also Table 1 regarding the clinical parameters of each subtype.

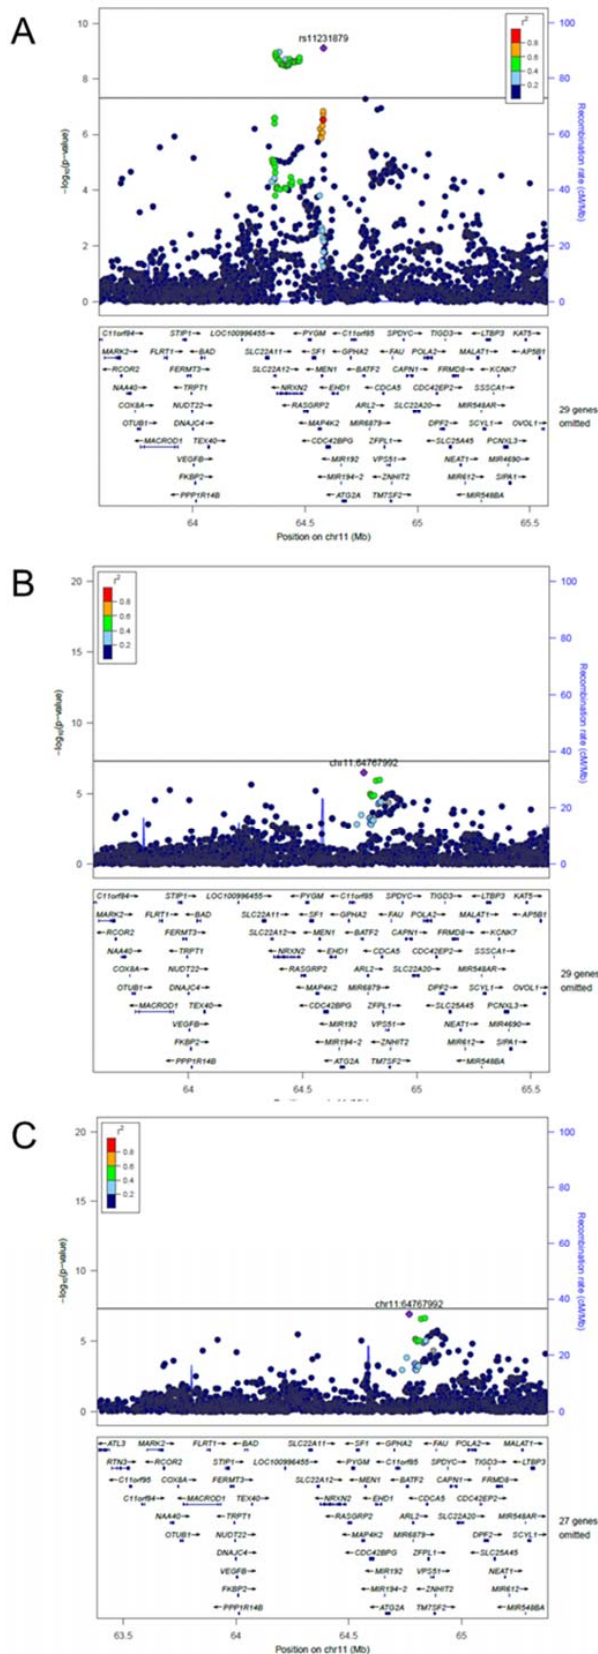

### Supplementary Figure S2 Regional plots around *CDC42BPG* on chromosome 11q13.1 locus

Significance around rs11231879 of *CDC42BPG* (A) was no longer shown when conditioned on rs11231879 itself (B), nor when conditioned on the secondarily significant SNP, rs56093838 of *SLC22A12/URAT1* (C), revealing these signals to be detected from the same locus. Because *URAT1* is a well-known urate transporter that markedly affects serum uric acid level, the true associated gene for combined type gout on this locus is unlikely to be *CDC42BPG*. These findings suggest that *SLC22A12/URAT1* is the actual associated gene for combined type gout on this locus (chromosome 11q13.1). Due to the lack of frequency data in 1000 genomes phase 3 JPT,  $r^2$  data were calculated using 1000 Genomes Project Phase\_3:EAS samples<sup>1</sup>.

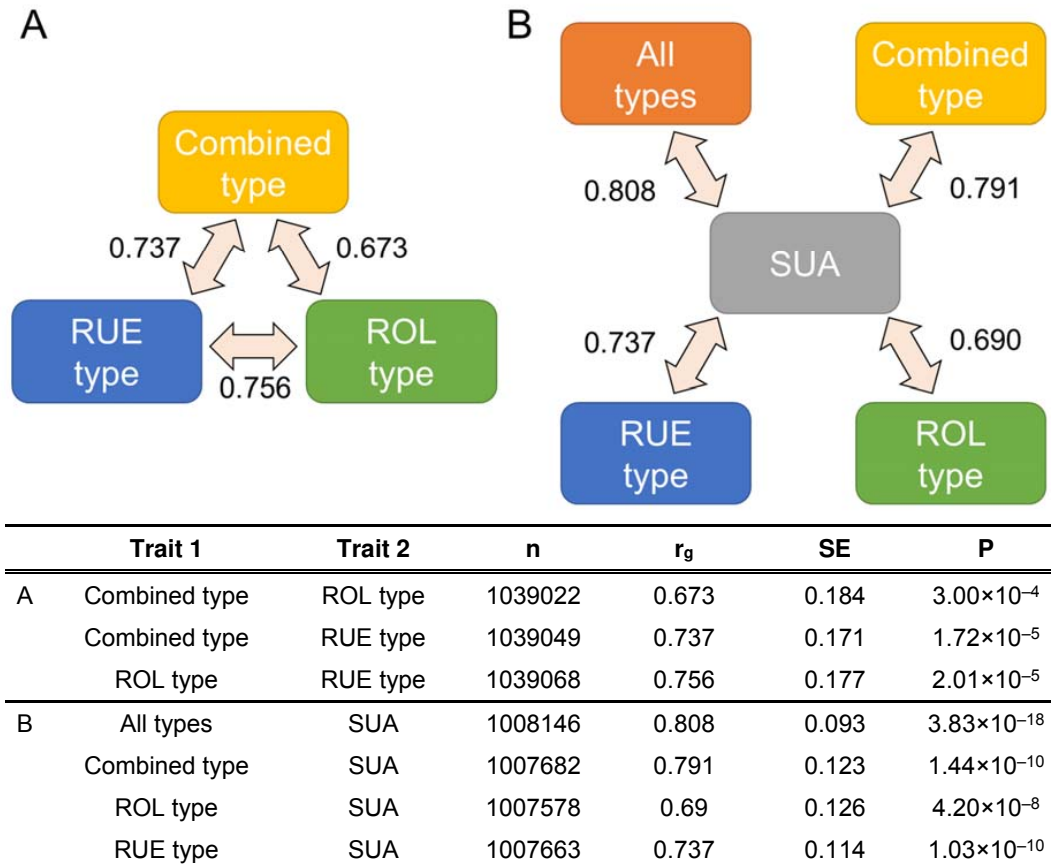

**Supplementary Figure S3 Genetic correlations between gout subtypes and between each subtype and serum uric acid levels**

Strong genetic correlations were detected (A) among each subtype and (B) between subtypes and serum uric acid (SUA) level.

$r_g$ , genetic correlation score; SE, standard error; ROL, renal overload; RUE, renal underexcretion; SUA, serum uric acid level.

**Supplementary Table S1 Clinical characteristics of meta-analyzed participants**

|                                      | Japonica Array platform |            | Illumina Array platform |             | Total       |            |
|--------------------------------------|-------------------------|------------|-------------------------|-------------|-------------|------------|
|                                      | Case                    | Control    | Case                    | Control     | Case        | Control    |
| Number                               | 1028                    | 952        | 2025                    | 3602        | 3053        | 4554       |
| Age (year)                           | 44.6 ± 11.4             | 54.1 ± 9.2 | 48.0 ± 11.8             | 55.5 ± 9.20 | 46.9 ± 11.8 | 55.2 ± 9.2 |
| Body-mass index (kg/m <sup>2</sup> ) | 25.2 ± 3.6              | 23.0 ± 2.9 | 25.0 ± 3.6              | 23.6 ± 3.0  | 25.1 ± 3.6  | 23.5 ± 3.0 |

Plus-minus values are means ± SD.

**Supplementary Table S2 Clinical parameters of gout cases**

|                         |               | <b>Number</b> | <b>SUA (mg/dl)</b> | <b>FE<sub>UA</sub> (%)</b> | <b>UUE (mg/hr/1.73 m<sup>2</sup>)</b> |
|-------------------------|---------------|---------------|--------------------|----------------------------|---------------------------------------|
| Japonica Array platform | RUE type      | 211           | 8.36 ± 1.28        | 3.78 ± 0.82                | 20.6 ± 3.6                            |
|                         | ROL type      | 137           | 8.17 ± 1.18        | 6.58 ± 0.96                | 37.6 ± 8.6                            |
|                         | Combined type | 349           | 8.75 ± 1.22        | 4.34 ± 0.69                | 31.9 ± 7.3                            |
|                         | Normal type   | 16            | 7.45 ± 0.73        | 6.59 ± 1.16                | 20.1 ± 4.6                            |
|                         | Total         | 713           | 8.50 ± 1.25        | 4.66 ± 1.31                | 29.4 ± 9.3                            |
| Illumina Array platform | RUE type      | 443           | 8.38 ± 1.15        | 3.78 ± 0.82                | 20.2 ± 3.5                            |
|                         | ROL type      | 349           | 8.20 ± 1.14        | 6.89 ± 1.62                | 36.4 ± 9.2                            |
|                         | Combined type | 556           | 8.76 ± 1.24        | 4.41 ± 0.72                | 31.6 ± 6.5                            |
|                         | Normal type   | 76            | 7.96 ± 1.24        | 6.30 ± 0.75                | 21.6 ± 2.8                            |
|                         | Total         | 1424          | 8.46 ± 1.21        | 4.93 ± 1.63                | 28.7 ± 9.2                            |
| Japonica Array platform | RUE type      | 654           | 8.37 ± 1.19        | 3.78 ± 0.82                | 20.3 ± 3.5                            |
|                         | ROL type      | 486           | 8.19 ± 1.15        | 6.81 ± 1.47                | 36.7 ± 9.0                            |
| +                       | Combined type | 905           | 8.75 ± 1.22        | 4.39 ± 0.71                | 31.7 ± 6.8                            |
| Illumina Array platform | Normal type   | 92            | 7.88 ± 1.19        | 6.35 ± 0.84                | 21.3 ± 3.2                            |
|                         | Total         | 2137          | 8.47 ± 1.23        | 4.84 ± 1.53                | 28.9 ± 9.2                            |

Plus-minus values are means ± SD.

SUA, serum uric acid; FE<sub>UA</sub>, fractional excretion of urate clearance; UUE, urinary urate excretion; ROL, renal overload; RUE, renal underexcretion.

**Supplementary Table S3 Frequency of concomitant diseases in gout cases**

| Concomitant diseases   | Frequency (%) |
|------------------------|---------------|
| Hypertension           | 27.8          |
| Dyslipidemia           | 7.30          |
| Diabetes mellitus      | 3.03          |
| Ischemic heart disease | 1.78          |
| Stroke                 | 0.59          |
| Renal disease*         | 1.17          |

Gout cases with subtype data (n = 2137) were investigated.

\*Renal disease is defined as high serum creatinine level ( $\geq 1.5$  mg/dl).

**Supplementary Table S4 Suggestive gout loci identified in the present genome-wide meta-analyses**

| SNP*                   | Locus    | Chr. | Position<br>(bp) <sup>†</sup> | Gene                         | Alleles |          | Illumina Array |                |                  |                       | Japonica Array |                |                  | Meta-analysis         |                  |                       |                |       |
|------------------------|----------|------|-------------------------------|------------------------------|---------|----------|----------------|----------------|------------------|-----------------------|----------------|----------------|------------------|-----------------------|------------------|-----------------------|----------------|-------|
|                        |          |      |                               |                              | Risk    | Non-risk | RAF<br>Case    | RAF<br>Control | OR (95%CI)       | P value               | RAF<br>Case    | RAF<br>Control | OR (95%CI)       | P value               | OR (95%CI)       | P value               | I <sup>2</sup> | HetP  |
| All gout patients      |          |      |                               |                              |         |          |                |                |                  |                       |                |                |                  |                       |                  |                       |                |       |
| rs1797052              | 1q21.1   | 1    | 145727683                     | <i>PDZK1</i>                 | T       | C        | 0.208          | 0.180          | 1.19 (1.07-1.31) | 7.60×10 <sup>-4</sup> | 0.228          | 0.176          | 1.39 (1.18-1.63) | 5.68×10 <sup>-5</sup> | 1.24 (1.14-1.35) | 5.99×10 <sup>-7</sup> | 61.9           | 0.105 |
| rs10167307             | 2p12     | 2    | 75716307                      | <i>TACR1 - EVA1A</i>         | G       | A        | 0.415          | 0.376          | 1.24 (1.13-1.35) | 3.85×10 <sup>-6</sup> | 0.404          | 0.380          | 1.14 (1.00-1.30) | 5.03×10 <sup>-2</sup> | 1.20 (1.12-1.30) | 8.59×10 <sup>-7</sup> | 0              | 0.331 |
| rs333042               | 8p21.3   | 8    | 19047771                      | <i>LOC100128993</i>          | T       | C        | 0.097          | 0.072          | 1.40 (1.22-1.62) | 2.38×10 <sup>-6</sup> | 0.096          | 0.079          | 1.24 (0.98-1.57) | 7.85×10 <sup>-2</sup> | 1.36 (1.20-1.53) | 7.16×10 <sup>-7</sup> | 0              | 0.376 |
| rs147430423            | 10q21.2  | 10   | 63849082                      | <i>ARID5B</i>                | G       | T        | 0.035          | 0.019          | 2.23 (1.69-2.93) | 1.34×10 <sup>-8</sup> | 0.027          | 0.024          | 1.21 (0.79-1.85) | 3.87×10 <sup>-1</sup> | 1.86 (1.48-2.35) | 1.57×10 <sup>-7</sup> | 81.9           | 0.019 |
| rs7116562              | 11p15.5  | 11   | 1371230                       | <i>TOLLIP - AS1 - BRISK2</i> | C       | T        | 0.559          | 0.520          | 1.16 (1.07-1.25) | 2.37×10 <sup>-4</sup> | 0.564          | 0.509          | 1.27 (1.12-1.44) | 2.50×10 <sup>-1</sup> | 1.19 (1.11-1.27) | 4.40×10 <sup>-7</sup> | 29.2           | 0.235 |
| rs557868370            | 12q13.11 | 12   | 46600163                      | <i>SLC38A1</i>               | T       | G        | 0.043          | 0.032          | 1.77 (1.41-2.23) | 8.80×10 <sup>-7</sup> | 0.036          | 0.030          | 1.29 (0.88-1.90) | 1.96×10 <sup>-1</sup> | 1.63 (1.34-1.99) | 9.97×10 <sup>-7</sup> | 47.7           | 0.167 |
| rs36045144             | 12q24.31 | 12   | 122618131                     | <i>MLXIP</i>                 | G       | A        | 0.298          | 0.255          | 1.25 (1.15-1.37) | 6.61×10 <sup>-7</sup> | 0.294          | 0.269          | 1.15 (1.00-1.32) | 5.58×10 <sup>-2</sup> | 1.22 (1.13-1.32) | 1.70×10 <sup>-7</sup> | 3.5            | 0.309 |
| RUE type gout patients |          |      |                               |                              |         |          |                |                |                  |                       |                |                |                  |                       |                  |                       |                |       |
| rs12035406             | 1q44     | 1    | 245927242                     | <i>SMYD3</i>                 | G       | A        | 0.732          | 0.676          | 1.41 (1.18-1.67) | 9.94×10 <sup>-5</sup> | 0.725          | 0.648          | 1.46 (1.15-1.85) | 1.77×10 <sup>-3</sup> | 1.42 (1.24-1.64) | 6.19×10 <sup>-7</sup> | 0              | 0.801 |
| rs1260333              | 2p23.3   | 2    | 27748624                      | <i>GCKR - C2orf16</i>        | A       | G        | 0.638          | 0.543          | 1.42 (1.22-1.64) | 3.95×10 <sup>-6</sup> | 0.630          | 0.570          | 1.28 (1.02-1.60) | 2.99×10 <sup>-2</sup> | 1.37 (1.21-1.55) | 4.57×10 <sup>-7</sup> | 0              | 0.452 |
| rs142840709            | 3p21.31  | 3    | 47764055                      | <i>SMARCC1</i>               | C       | G        | 0.039          | 0.018          | 3.43 (2.13-5.53) | 4.25×10 <sup>-7</sup> | 0.038          | 0.023          | 1.82 (0.98-3.41) | 5.88×10 <sup>-2</sup> | 2.72 (1.86-3.97) | 2.42×10 <sup>-7</sup> | 59.7           | 0.115 |
| rs142605903            | 3p14.1   | 3    | 69632183                      | <i>FRMD4B - MITF</i>         | A       | T        | 0.046          | 0.017          | 2.98 (2.04-4.34) | 1.43×10 <sup>-8</sup> | 0.010          | 0.011          | 0.82 (0.27-2.49) | 7.29×10 <sup>-1</sup> | 2.6 (1.82-3.72)  | 1.47×10 <sup>-7</sup> | 78.5           | 0.031 |
| rs6949071              | 7p21.3   | 7    | 13655049                      | <i>ARL4A - ETV1</i>          | C       | G        | 0.280          | 0.226          | 1.45 (1.21-1.74) | 5.04×10 <sup>-5</sup> | 0.287          | 0.222          | 1.55 (1.18-2.03) | 1.62×10 <sup>-3</sup> | 1.48 (1.27-1.72) | 3.03×10 <sup>-7</sup> | 0              | 0.702 |
| rs149662848            | 7q31.1   | 7    | 109563564                     | <i>C7orf66 - EIF3IP1</i>     | C       | T        | 0.033          | 0.017          | 2.08 (1.36-3.19) | 7.60×10 <sup>-4</sup> | 0.049          | 0.018          | 3.59 (1.94-6.63) | 4.50×10 <sup>-5</sup> | 2.49 (1.75-3.53) | 3.51×10 <sup>-7</sup> | 50.8           | 0.154 |
| rs35679068             | 7q36.1   | 7    | 150881888                     | <i>ASB10</i>                 | T       | A        | 0.158          | 0.110          | 1.54 (1.26-1.88) | 2.17×10 <sup>-5</sup> | 0.146          | 0.105          | 1.49 (1.09-2.02) | 1.18×10 <sup>-2</sup> | 1.52 (1.29-1.80) | 8.08×10 <sup>-7</sup> | 0              | 0.857 |
| rs6987025              | 8q11.23  | 8    | 52663478                      | <i>PXDNL</i>                 | T       | A        | 0.052          | 0.021          | 2.56 (1.81-3.63) | 1.28×10 <sup>-7</sup> | 0.028          | 0.023          | 1.25 (0.64-2.43) | 5.07×10 <sup>-1</sup> | 2.19 (1.61-2.98) | 6.20×10 <sup>-7</sup> | 71.4           | 0.062 |
| rs77984796             | 11q13.4  | 11   | 74272174                      | <i>LOC100287896 - POLD3</i>  | C       | T        | 0.040          | 0.017          | 2.78 (1.84-4.19) | 1.18×10 <sup>-6</sup> | 0.027          | 0.015          | 1.95 (0.91-4.16) | 8.40×10 <sup>-2</sup> | 2.56 (1.78-3.68) | 3.51×10 <sup>-7</sup> | 0              | 0.421 |



## ROL type gout patients

|            |         |    |          |                       |   |   |       |       |                  |                       |       |       |                  |                       |                  |                       |      |       |
|------------|---------|----|----------|-----------------------|---|---|-------|-------|------------------|-----------------------|-------|-------|------------------|-----------------------|------------------|-----------------------|------|-------|
| rs11974814 | 7q22.1  | 7  | 99719504 | <i>CNPY4</i>          | C | T | 0.191 | 0.131 | 1.74 (1.41-2.16) | $2.94 \times 10^{-7}$ | 0.147 | 0.128 | 1.22 (0.82-1.81) | $3.25 \times 10^{-1}$ | 1.61 (1.33-1.94) | $6.22 \times 10^{-7}$ | 58.6 | 0.120 |
| rs11201829 | 10q23.1 | 10 | 87671031 | <i>GRID1</i>          | G | T | 0.037 | 0.015 | 3.86 (2.33-6.38) | $1.51 \times 10^{-7}$ | 0.000 | 0.012 | -                | $9.83 \times 10^{-1}$ | 3.86 (2.33-6.38) | $1.51 \times 10^{-7}$ | 0    | 0.983 |
| rs62070600 | 17q24.3 | 17 | 68714214 | <i>KCNJ2 - CASC17</i> | G | A | 0.103 | 0.065 | 1.61 (1.24-2.1)  | $3.62 \times 10^{-4}$ | 0.124 | 0.068 | 2.2 (1.43-3.38)  | $3.12 \times 10^{-4}$ | 1.76 (1.4-2.2)   | $8.41 \times 10^{-7}$ | 31   | 0.229 |

## Combined type gout patients

|             |         |   |           |                         |   |   |       |       |                  |                       |       |       |                  |                       |                  |                       |      |       |
|-------------|---------|---|-----------|-------------------------|---|---|-------|-------|------------------|-----------------------|-------|-------|------------------|-----------------------|------------------|-----------------------|------|-------|
| rs145480657 | 2q21.2  | 2 | 134359704 | <i>NCKAP5 - MIR3679</i> | A | G | 0.039 | 0.015 | 2.83 (1.91-4.18) | $1.80 \times 10^{-7}$ | 0.021 | 0.015 | 1.44 (0.73-2.84) | $2.98 \times 10^{-1}$ | 2.39 (1.71-3.36) | $4.51 \times 10^{-7}$ | 65.1 | 0.091 |
| rs11099097  | 4q21.21 | 4 | 81167309  | <i>PRDM8 - FGF5</i>     | C | T | 0.723 | 0.670 | 1.34 (1.15-1.55) | $1.08 \times 10^{-4}$ | 0.732 | 0.665 | 1.41 (1.16-1.72) | $6.89 \times 10^{-1}$ | 1.36 (1.21-1.53) | $2.89 \times 10^{-7}$ | 0    | 0.662 |

## Normal type gout patients

|             |          |    |           |                              |   |   |       |       |                   |                       |       |       |                    |                       |                   |                       |      |       |
|-------------|----------|----|-----------|------------------------------|---|---|-------|-------|-------------------|-----------------------|-------|-------|--------------------|-----------------------|-------------------|-----------------------|------|-------|
| rs185157360 | 3q26.33  | 3  | 179058549 | <i>ZNF639 - MFN1</i>         | G | C | 0.054 | 0.013 | 9.59 (3.99-23.07) | $4.47 \times 10^{-7}$ | 0.001 | 0.016 | 0 (0-106952995.34) | $6.35 \times 10^{-1}$ | 9.49 (3.95-22.82) | $4.97 \times 10^{-7}$ | 0    | 0.512 |
| rs76952758  | 6p21.1   | 6  | 45683258  | <i>RUNX2 - CLIC5</i>         | T | C | 0.061 | 0.014 | 7.77 (3.44-17.52) | $7.82 \times 10^{-7}$ | 0.017 | 0.012 | 2.44 (0.08-71.50)  | $6.05 \times 10^{-1}$ | 7.29 (3.31-16.07) | $8.49 \times 10^{-7}$ | 0    | 0.514 |
| rs150881933 | 6p12.1   | 6  | 56581700  | <i>DST</i>                   | T | C | 0.054 | 0.019 | 6.68 (2.79-15.99) | $1.98 \times 10^{-5}$ | 0.095 | 0.025 | 8.36 (1.86-37.57)  | $5.59 \times 10^{-3}$ | 7.07 (3.33-15.04) | $3.74 \times 10^{-7}$ | 0    | 0.800 |
| rs118003389 | 7q21.11  | 7  | 81361574  | <i>HGF</i>                   | G | C | 0.144 | 0.047 | 4.23 (2.54-7.04)  | $2.81 \times 10^{-8}$ | 0.045 | 0.059 | 0.68 (0.11-4.22)   | $6.81 \times 10^{-1}$ | 3.71 (2.27-6.05)  | $1.63 \times 10^{-7}$ | 72.1 | 0.059 |
| rs79022888  | 9q34.13  | 9  | 135005875 | <i>MED27 - NTNG2</i>         | T | C | 0.123 | 0.048 | 3.26 (1.89-5.62)  | $2.18 \times 10^{-5}$ | 0.180 | 0.061 | 4.19 (1.49-11.81)  | $6.62 \times 10^{-3}$ | 3.44 (2.12-5.57)  | $5.13 \times 10^{-7}$ | 0    | 0.672 |
| rs4558213   | 12q24.32 | 12 | 127291825 | <i>LINC00944 - LINC02372</i> | T | A | 0.730 | 0.553 | 2.42 (1.66-3.51)  | $3.49 \times 10^{-6}$ | 0.719 | 0.558 | 2.06 (0.92-4.60)   | $7.71 \times 10^{-2}$ | 2.35 (1.67-3.29)  | $7.33 \times 10^{-7}$ | 0    | 0.726 |
| rs139921868 | 15q26.1  | 15 | 91741296  | <i>SV2B</i>                  | C | T | 0.044 | 0.014 | 4.25 (1.79-10.12) | $1.07 \times 10^{-3}$ | 0.117 | 0.014 | 21.31 (5.11-88.92) | $2.69 \times 10^{-5}$ | 6.56 (3.13-13.78) | $6.50 \times 10^{-7}$ | 72   | 0.059 |
| rs71651656  | 21q21.3  | 21 | 27140536  | <i>GABPA</i>                 | C | T | 0.052 | 0.012 | 7.44 (3.25-17.00) | $1.97 \times 10^{-6}$ | 0.073 | 0.014 | 7.46 (1.57-35.48)  | $1.16 \times 10^{-2}$ | 7.44 (3.58-15.45) | $7.23 \times 10^{-8}$ | 0    | 0.997 |

\*dbSNP rs number.

†SNP positions are based on NCBI human genome reference sequence Build hg19.

Chr., chromosome; RAF, risk allele frequency; OR, odds ratio; CI, confidence interval; RUE, renal underexcretion; ROL, renal overload.

**Supplementary Table S5 Overlap between natural selection signatures and genetic risk of gout and its subtypes in the Japanese population**

| Label         | All associated SNPs |               |                       | SNPs outside of <i>ALDH2</i> |               |                       | SNPs outside of <i>ABCG2</i> |               |                       | SNPs outside of <i>ABCG2</i> and <i>ALDH2</i> |               |         |
|---------------|---------------------|---------------|-----------------------|------------------------------|---------------|-----------------------|------------------------------|---------------|-----------------------|-----------------------------------------------|---------------|---------|
|               | N                   | SDSChi_Inflat | P value               | N                            | SDSChi_Inflat | P value               | N                            | SDSChi_Inflat | P value               | N                                             | SDSChi_Inflat | P value |
| All gout      | 14                  | 3.78          | 1.95×10 <sup>-6</sup> | 13                           | 2.25          | 5.97×10 <sup>-3</sup> | 13                           | 3.42          | 2.61×10 <sup>-5</sup> | 12                                            | 1.73          | 0.0538  |
| RUE type      | 12                  | 3.57          | 2.35×10 <sup>-5</sup> | 11                           | 1.99          | 0.0250                | 11                           | 3.13          | 3.13×10 <sup>-4</sup> | 10                                            | 1.34          | 0.202   |
| ROL type      | 5                   | 5.86          | 2.03×10 <sup>-5</sup> | 4                            | 3.06          | 0.0157                | 4                            | 5.20          | 3.49×10 <sup>-4</sup> | 3                                             | 1.24          | 0.293   |
| Combined type | 8                   | 5.10          | 2.30×10 <sup>-6</sup> | 7                            | 3.27          | 1.77×10 <sup>-3</sup> | 7                            | 4.60          | 3.71×10 <sup>-5</sup> | 6                                             | 2.39          | 0.0260  |
| Normal type   | 10                  | 1.50          | 0.133                 | 10                           | 1.50          | 0.133                 | 9                            | 0.72          | 0.693                 | 9                                             | 0.72          | 0.693   |

SDSChi\_Inflat, inflation of the selection  $\chi^2$  value of singleton density score.

**Supplementary Table S6 The effect of each gout locus from another trans-ancestry gout GWAS meta-analysis**

| SNP <sup>*</sup>  | Locus          | Chr.      | Position <sup>†</sup> | Gene <sup>‡</sup>    | Alleles  |          | Present meta-analysis <sup>§</sup> |                             | Meta-analysis of gout by Tin <i>et al.</i> <sup>¶</sup> |        |                   |                         |
|-------------------|----------------|-----------|-----------------------|----------------------|----------|----------|------------------------------------|-----------------------------|---------------------------------------------------------|--------|-------------------|-------------------------|
|                   |                |           |                       |                      | Risk     | Non-risk | OR (95%CI)                         | P value                     | N                                                       | RAF    | OR (95%CI)        | P value                 |
| rs1260326         | 2p23.3         | 2         | 27730940              | <i>GCKR</i>          | T        | C        | 1.30 (1.21-1.39)                   | 2.07×10 <sup>-13</sup>      | 721559                                                  | 0.390  | 1.20 (1.18-1.24)  | 6.40×10 <sup>-45</sup>  |
| rs3775946         | 4p16.1         | 4         | 9995256               | <i>SLC2A9</i>        | G        | A        | 1.63 (1.52-1.75)                   | 3.73×10 <sup>-41</sup>      | 763753                                                  | 0.760  | 1.52 (1.47-1.57)  | 3.19×10 <sup>-158</sup> |
| rs4148155         | 4q22.1         | 4         | 89054667              | <i>ABCG2</i>         | G        | A        | 2.23 (2.08-2.41)                   | 1.81×10 <sup>-101</sup>     | 763813                                                  | 0.111  | 2.04 (1.97-2.12)  | 2.64×10 <sup>-299</sup> |
| rs2817188         | 6p22.2         | 6         | 25807603              | <i>SLC17A1</i>       | G        | A        | 1.35 (1.22-1.50)                   | 1.06×10 <sup>-8</sup>       | 763774                                                  | 0.553  | 1.18 (1.15-1.21)  | 1.47×10 <sup>-35</sup>  |
| rs3129500         | 10q23.2        | 10        | 88915107              | <i>SHLD2/FAM35A</i>  | G        | A        | 1.37 (1.28-1.48)                   | 4.34×10 <sup>-17</sup>      | 259987                                                  | 0.869  | 1.04 (0.96-1.13)  | 0.306                   |
| rs145954970       | 11q13.1        | 11        | 64273830              | <i>SLC22A11</i>      | C        | G        | 12.43 (7.39-20.92)                 | 2.25×10 <sup>-21</sup>      | NA                                                      | NA     | NA                | NA                      |
| rs671             | 12q24.12       | 12        | 112241766             | <i>ALDH2</i>         | G        | A        | 1.93 (1.78-2.10)                   | 3.19×10 <sup>-54</sup>      | 449508                                                  | 0.9999 | 2.47 (0.29-21.22) | 0.410                   |
| <b>rs76499759</b> | <b>13q22.1</b> | <b>13</b> | <b>73568511</b>       | <b><i>PIBF1</i></b>  | <b>A</b> | <b>G</b> | <b>1.27 (1.17-1.38)</b>            | <b>2.79×10<sup>-8</sup></b> | 660138                                                  | 0.006  | 1.19 (0.86-1.66)  | 0.287                   |
| <b>rs9926388</b>  | <b>16p12.3</b> | <b>16</b> | <b>20558441</b>       | <b><i>ACSM2B</i></b> | <b>A</b> | <b>G</b> | <b>1.24 (1.15-1.33)</b>            | <b>2.30×10<sup>-8</sup></b> | 763875                                                  | 0.796  | 1.02 (0.99-1.05)  | 0.254                   |
| rs1010269         | 17q23.2        | 17        | 59448945              | <i>BCAS3</i>         | G        | A        | 1.24 (1.16-1.33)                   | 1.81×10 <sup>-9</sup>       | 721559                                                  | 0.820  | 1.09 (1.05-1.12)  | 3.30×10 <sup>-6</sup>   |

\*dbSNP rs number.

†SNP positions are based on NCBI human genome reference sequence Build hg19.

‡Novel loci in the present meta-analysis are shown in bold.

§The results from all gout cases are shown, since the data for subtype GWAS of gout were not available in other studies.

¶Tin *et al.* performed the trans-ancestry GWAS meta-analysis of gout, including self-reported gout cases<sup>2</sup>, while our present study analyzed only clinically-defined gout.

Chr.: chromosome; RAF: risk allele frequency; OR: odds ratio; CI: confidence interval.

## Supplementary method

### Study subjects and patients' involvement

We performed subtype genome-wide meta-analyses based on two case-control data sets for clinically-defined gout that included the Japonica Array<sup>3</sup> and Illumina Array data sets. Patients with known clinical parameters were recruited from Japanese male outpatients at the gout clinics of Jikei University Hospital (Tokyo, Japan), Midorigaoka Hospital (Osaka, Japan), Kyoto Industrial Health Association (Kyoto, Japan), Ryougoku East Gate Clinic (Tokyo, Japan), Nagase Clinic (Tokyo, Japan), Tokorozawa Central Hospital (Tokorozawa, Japan) and Wakasa Clinic (Tokorozawa, Japan). All 3104 cases (1048 cases for the Japonica Array and 2056 for the Illumina Array) were clinically diagnosed as having primary gout according to the criteria established by the American College of Rheumatology,<sup>4</sup> and their subtypes were also diagnosed along with their clinical parameters as described previously<sup>5-8</sup> (Table 1 and Online Supplementary Figure S1). As controls, 6081 individuals (1179 and 4902 controls for the Japonica Array and Illumina Array, respectively) were assigned from Japanese male participants in the Japan Multi-Institutional Collaborative Cohort Study (J-MICC Study).<sup>9,10</sup> This research was done without patient involvement. Patients were not invited to comment on the study design and were not consulted to develop patient-relevant outcomes or interpret the results. Patients were not invited to contribute to the writing or editing of this document for readability or accuracy.

### Genotyping and imputation for the Japonica Array data set

A total of 1048 male clinically-defined gout cases and 1179 male controls from the J-MICC Study<sup>9,10</sup> were genotyped with the use of a Japonica SNP Array.<sup>3</sup> The clustering plots were first classified by the Ps classification function in the SNPfisher package (version 1.5.2; Affymetrix). Single nucleotide polymorphisms (SNPs) that were assigned 'recommended' by the Ps classification were retained. Seven samples (two cases and five controls) with a genotype call rate of < 0.98 were excluded. Three controls with inconsistent sex information between questionnaires and the estimate from genotype were excluded. The identity-by-descent method implemented in PLINK 1.9 software<sup>11</sup> detected 17 duplicates or closely related pairs of samples ( $\pi$ -hat > 0.1875), with one sample in each pair (15 cases and 2 controls) being excluded. One control indicated a relationship to other samples ( $\pi$ -hat > 0.05), and was removed. Principal component analysis (PCA)<sup>12</sup> with the 1000 Genomes Project reference panel (Phase 3)<sup>1</sup> detected four subjects (3 cases and 1 control) with probable ancestries outside the Japanese population: these four samples were also excluded. Among the SNPs that were genotyped with the array, we excluded SNPs at the pseudo-autosomal regions of chromosome X as well as a) those with a

genotype call rate of  $< 0.98$ , b) a Hardy-Weinberg equilibrium exact test P value of  $< 1 \times 10^{-6}$ , c) a minor allele frequency (MAF) of  $< 0.01$ , or d) a departure from the allele frequency computed from the 1000 Genomes Project Phase 3 EAS samples<sup>1</sup>. This quality control filtering process resulted in the selection of 1028 case subjects and 1167 control subjects as well as 603,009 SNPs. Pre-phasing and imputation were performed using SHAPEIT2<sup>13</sup> and Minimac3,<sup>14</sup> respectively. Post-imputation quality control was performed by excluding SNPs with an imputation quality score ( $r^2$ ) of  $< 0.3$ , MAF  $< 0.01$  and indels; also excluded were 215 controls who had hyperuricemia (serum uric acid level (SUA)  $> 7.0$  mg/dl) or a past history of gout. Ultimately, 1028 case subjects and 952 control subjects as well as 7,529,176 SNPs remained for the GWAS analysis.

### **Genotyping and imputation for the Illumina Array data set**

As case data, 2056 male clinically-defined gout cases subjects were genotyped with the use of HumanOmniExpress or HumanOmniExpressExome BeadChip Arrays (Illumina, San Diego, CA, USA). One sample with a genotype call rate of  $< 0.98$  was excluded. No samples showed a discrepancy between genetic and reported sex. The identity-by-descent method implemented in PLINK 1.9 software<sup>11</sup> detected 17 duplicates or closely-related pairs of samples ( $\pi$ -hat  $> 0.1875$ ), with one sample of each pair being excluded. PCA<sup>12</sup> with the 1000 Genomes Project reference panel (Phase 3)<sup>1</sup> detected six subjects who were estimated to have ancestries outside the Japanese population: these were excluded. As control data, 4902 male controls with SUA data from the J-MICC study,<sup>9,10</sup> who had been previously genotyped at the RIKEN Center for Integrative Medicine Sciences using a HumanOmniExpressExome BeadChip Array (Illumina, San Diego, CA, USA) with sample QC of the control data,<sup>15,16</sup> were used. No samples were excluded for reasons of a genotype call rate of  $< 0.98$  or a discrepancy between genetic and reported sex. The identity-by-descent method implemented in PLINK 1.9 software<sup>11</sup> detected one sample having a relationship with a gout case ( $\pi$ -hat  $> 0.1875$ ), which was excluded. PCA<sup>12</sup> with the 1000 Genomes Project reference panel (Phase 3)<sup>1</sup> detected no subjects estimated to have ancestries outside the Japanese population. After sample QC, the case and control datasets were merged. Of the SNPs that were consistently genotyped across the arrays, we excluded SNPs at the pseudo-autosomal regions of chromosome X as well as those with a genotype call rate of  $< 0.98$ , a Hardy-Weinberg equilibrium exact test P value of  $< 1 \times 10^{-6}$  or a MAF of  $< 0.01$ . This quality control filtering resulted in the selection of 2032 case subjects and 4901 control subjects as well as 553,321 SNPs. Post-imputation quality control was performed by excluding SNPs with an imputation quality score ( $r^2$ ) of  $< 0.3$ , MAF  $< 0.01$  and indels. 1062 controls with hyperuricemia (SUA  $> 7.0$  mg/dl) or with a past history of gout were excluded. 244 samples (7 cases and 237 controls) that overlapped with the Japonica Arrays samples were

removed. Ultimately, 2025 case subjects and 3602 control subjects as well as 7,356,207 SNPs remained for GWAS analysis.

**References for Supplementary Method**

1. Auton, A. *et al.* A global reference for human genetic variation. *Nature* **526**, 68-74 (2015).
2. Tin, A. *et al.* Target genes, variants, tissues and transcriptional pathways influencing human serum urate levels. *Nat. Genet.* **51**, 1459-1474 (2019).
3. Kawai, Y. *et al.* Japonica array: improved genotype imputation by designing a population-specific SNP array with 1070 Japanese individuals. *J. Hum. Genet.* **60**, 581-587 (2015).
4. Wallace, S. L. *et al.* Preliminary criteria for the classification of the acute arthritis of primary gout. *Arthritis Rheum.* **20**, 895-900 (1977).
5. Dalbeth, N. *et al.* Gout. *Nat. Rev. Dis. Primers* **5**, 69 (2019).
6. Ichida, K. *et al.* Decreased extra-renal urate excretion is a common cause of hyperuricemia. *Nat. Commun.* **3**, 764 (2012).
7. Matsuo, H. *et al.* ABCG2 dysfunction causes hyperuricemia due to both renal urate underexcretion and renal urate overload. *Sci. Rep.* **4**, 3755 (2014).
8. Matsuo, H. *et al.* Genome-wide association study of clinically defined gout identifies multiple risk loci and its association with clinical subtypes. *Ann. Rheum. Dis.* **75**, 652-659 (2016).
9. Hamajima, N. & J-MICC Study Group. The Japan Multi-Institutional Collaborative Cohort Study (J-MICC Study) to detect gene-environment interactions for cancer. *Asian Pac. J. Cancer Prev.* **8**, 317-323 (2007).
10. Asai, Y. *et al.* Baseline data of Shizuoka area in the Japan Multi-Institutional Collaborative Cohort Study (J-MICC Study). *Nagoya J. Med. Sci.* **71**, 137-144 (2009).
11. Chang, C. C. *et al.* Second-generation PLINK: rising to the challenge of larger and richer datasets. *GigaScience* **4**, 7 (2015).
12. Patterson, N., Price, A. L. & Reich, D. Population structure and eigenanalysis. *PLoS Genet.* **2**, e190 (2006).
13. Delaneau, O., Zagury, J. F. & Marchini, J. Improved whole-chromosome phasing for disease and population genetic studies. *Nat. Methods* **10**, 5-6 (2013).
14. Das, S. *et al.* Next-generation genotype imputation service and methods. *Nat. Genet.* **48**, 1284-1287 (2016).
15. Hishida, A. *et al.* Genome-wide association study of renal function traits: results from the Japan Multi-Institutional Collaborative Cohort Study. *Am. J. Nephrol.* **47**, 304-316 (2018).

16. Nakagawa-Senda, H. *et al.* A genome-wide association study in the Japanese population identifies the 12q24 locus for habitual coffee consumption: The J-MICC Study. *Sci. Rep.* **8**, 1493 (2018).
